# Supplementary material
Source: PubMed Central journal article supplement (PMC3988278)
Supplement: NIHMS546217-supplement-supplement_1.pdf [file NIHMS546217-supplement-supplement_1.pdf]

Supplemental Table 1. Comparison of Criterion Validity Between the General Cognitive Performance Factor and its Constituent Cognitive Tests: Results from ADAMS (N=856)

|                               | CIND                 |                                        | Dementia             |                                        |
|-------------------------------|----------------------|----------------------------------------|----------------------|----------------------------------------|
|                               | Area under the curve | P-value compared to the general factor | Area under the curve | P-value compared to the general factor |
| General cognitive performance | 0.84                 |                                        | 0.97                 |                                        |
| Trails A                      | 0.75                 | <0.001                                 | 0.81                 | <0.001                                 |
| Trails B                      | 0.77                 | <0.001                                 | 0.86                 | <0.001                                 |
| Digit Span Forwards           | 0.68                 | <0.001                                 | 0.79                 | <0.001                                 |
| Digit Span Backwards          | 0.69                 | <0.001                                 | 0.83                 | <0.001                                 |
| Semantic Fluency              | 0.72                 | <0.001                                 | 0.94                 | <0.001                                 |
| Phonemic Fluency              | 0.68                 | <0.001                                 | 0.86                 | <0.001                                 |
| Boston Naming Test - 15 items | 0.73                 | <0.001                                 | 0.88                 | <0.001                                 |
| Symbol Digit Modalities       | 0.82                 | <0.001                                 | 0.92                 | <0.001                                 |
| CERAD word recall - immediate | 0.79                 | <0.001                                 | 0.99                 | <0.001                                 |
| CERAD word recall - delayed   | 0.70                 | <0.001                                 | 0.91                 | <0.001                                 |

Legend. Test scores were validated against reference standard clinical diagnoses of either dementia or CIND. Areas under the curve were compared to the general cognitive performance factor.

CERAD: Consortium to Establish a Registry for Alzheimer's Disease; CIND: Cognitive impairment without dementia



Supplemental Table 2. Cutoffs for bins of cognitive tests.

| Cognitive test                                              | Number of categories | Interval of original test score units |          |          |          |          |          |          |          |          |        |
|-------------------------------------------------------------|----------------------|---------------------------------------|----------|----------|----------|----------|----------|----------|----------|----------|--------|
|                                                             |                      | Bin1                                  | Bin2     | Bin3     | Bin4     | Bin5     | Bin6     | Bin7     | Bin8     | Bin9     | Bin10  |
| Trails A (Time to complete, seconds)                        | 10                   | 144, 150                              | 129, 143 | 115, 128 | 100, 114 | 86, 99   | 72, 85   | 57, 71   | 43, 56   | 29, 42   | 16, 28 |
| Trails B (Time to complete, seconds)                        | 10                   | 287, 300                              | 256, 281 | 226, 254 | 196, 225 | 166, 195 | 136, 165 | 106, 135 | 76, 105  | 46, 75   | 28, 45 |
| Digit Span Forwards (Total number of digits)                | 9                    | 0, 0                                  | 1, 2     | 3, 4     | 5, 6     | 7, 8     | 9, 9     | 10, 11   | 12, 13   | 14, 16   |        |
| Digit Span Backwards (Total number of digits)               | 10                   | 0, 0                                  | 1, 2     | 3, 3     | 4, 5     | 6, 6     | 7, 7     | 8, 9     | 10, 10   | 11, 12   | 13, 13 |
| Semantic Fluency (Number of items)                          | 9                    | 0, 1                                  | 2, 5     | 6, 9     | 10, 12   | 13, 16   | 17, 20   | 21, 23   | 24, 27   | 28, 33   |        |
| Phonemic Fluency (Number of items)                          | 9                    | 0, 3                                  | 4, 11    | 12, 18   | 19, 25   | 26, 33   | 34, 40   | 41, 47   | 48, 55   | 56, 66   |        |
| Boston Naming Test - 15 items (Number of items)             | 10                   | 0, 0                                  | 1, 2     | 3, 4     | 5, 5     | 6, 7     | 8, 9     | 10, 10   | 11, 12   | 13, 14   | 15, 15 |
| Symbol Digit Modalities (Total number of correct numbers)   | 9                    | 0, 3                                  | 4, 10    | 11, 17   | 18, 24   | 25, 31   | 32, 38   | 39, 45   | 46, 50   | 54, 63   |        |
| Digit Symbol Substitution (Total number of correct symbols) | 8                    | 5, 20                                 | 21, 26   | 27, 32   | 33, 39   | 40, 45   | 46, 51   | 52, 57   | 58, 61   |          |        |
| CERAD word recall – immediate (Number of words)             | 9                    | 0, 1                                  | 2, 4     | 5, 8     | 9, 11    | 12, 14   | 15, 17   | 18, 20   | 21, 24   | 25, 29   |        |
| HVLT sum of recall – immediate (Number of words)            | 8                    | 5, 13                                 | 14, 16   | 17, 19   | 20, 22   | 23, 25   | 26, 29   | 30, 31   | 33, 34   |          |        |
| CERAD word recall – delayed (Number of words recalled)      | 9                    | 0, 11                                 | 12, 33   | 37, 55   | 57, 77   | 80, 100  | 111, 120 | 125, 140 | 150, 150 | 200, 200 |        |
| HVLT sum of recall – delayed (Number of words)              | 7                    | 0, 0                                  | 25, 50   | 55, 66   | 70, 83   | 85, 91   | 100, 116 | 120, 150 |          |          |        |
| Visual Search and Attention (Number of targets)             | 8                    | 20, 27                                | 28, 32   | 33, 37   | 38, 42   | 43, 46   | 47, 51   | 52, 56   | 57, 64   |          |        |



Supplemental Figure 1. Bland-Altman Plot of General Cognitive Performance Factors in Simulated Data (N=100,001)

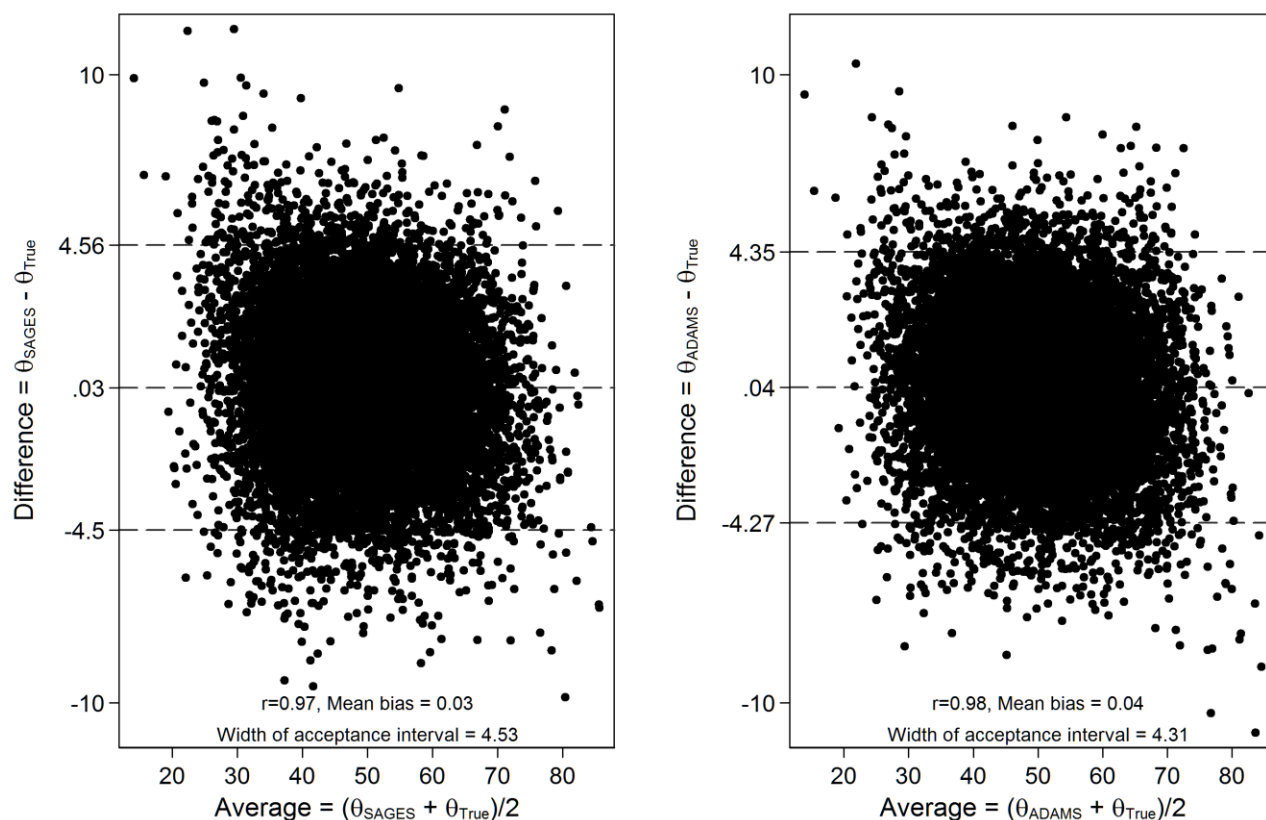

Legend. This plot is used to examine systematic bias in the general cognitive performance measures in SAGES and in ADAMS compared with a true score known in simulated data. The Y axis of each panel shows the difference between a factor score using test items from SAGES (left panel) or ADAMS (right panel) and a true factor score using all items in simulated data. The X axis shows the mean of the scores. Horizontal dotted lines depict the mean difference, or bias, with 95% confidence bounds between the two scores. The high correlation ( $r=0.97$  in SAGES;  $r=0.98$  in SAGES), small amount of bias (in SAGES, 0.03 points, or a 0.0003 standard deviation difference), and lack of systematic deviation over the range of cognitive functioning suggests the general cognitive performance scores in SAGES and ADAMS are the same.
